# Supplementary material
Source: PubMed Central journal article supplement (PMC169936)

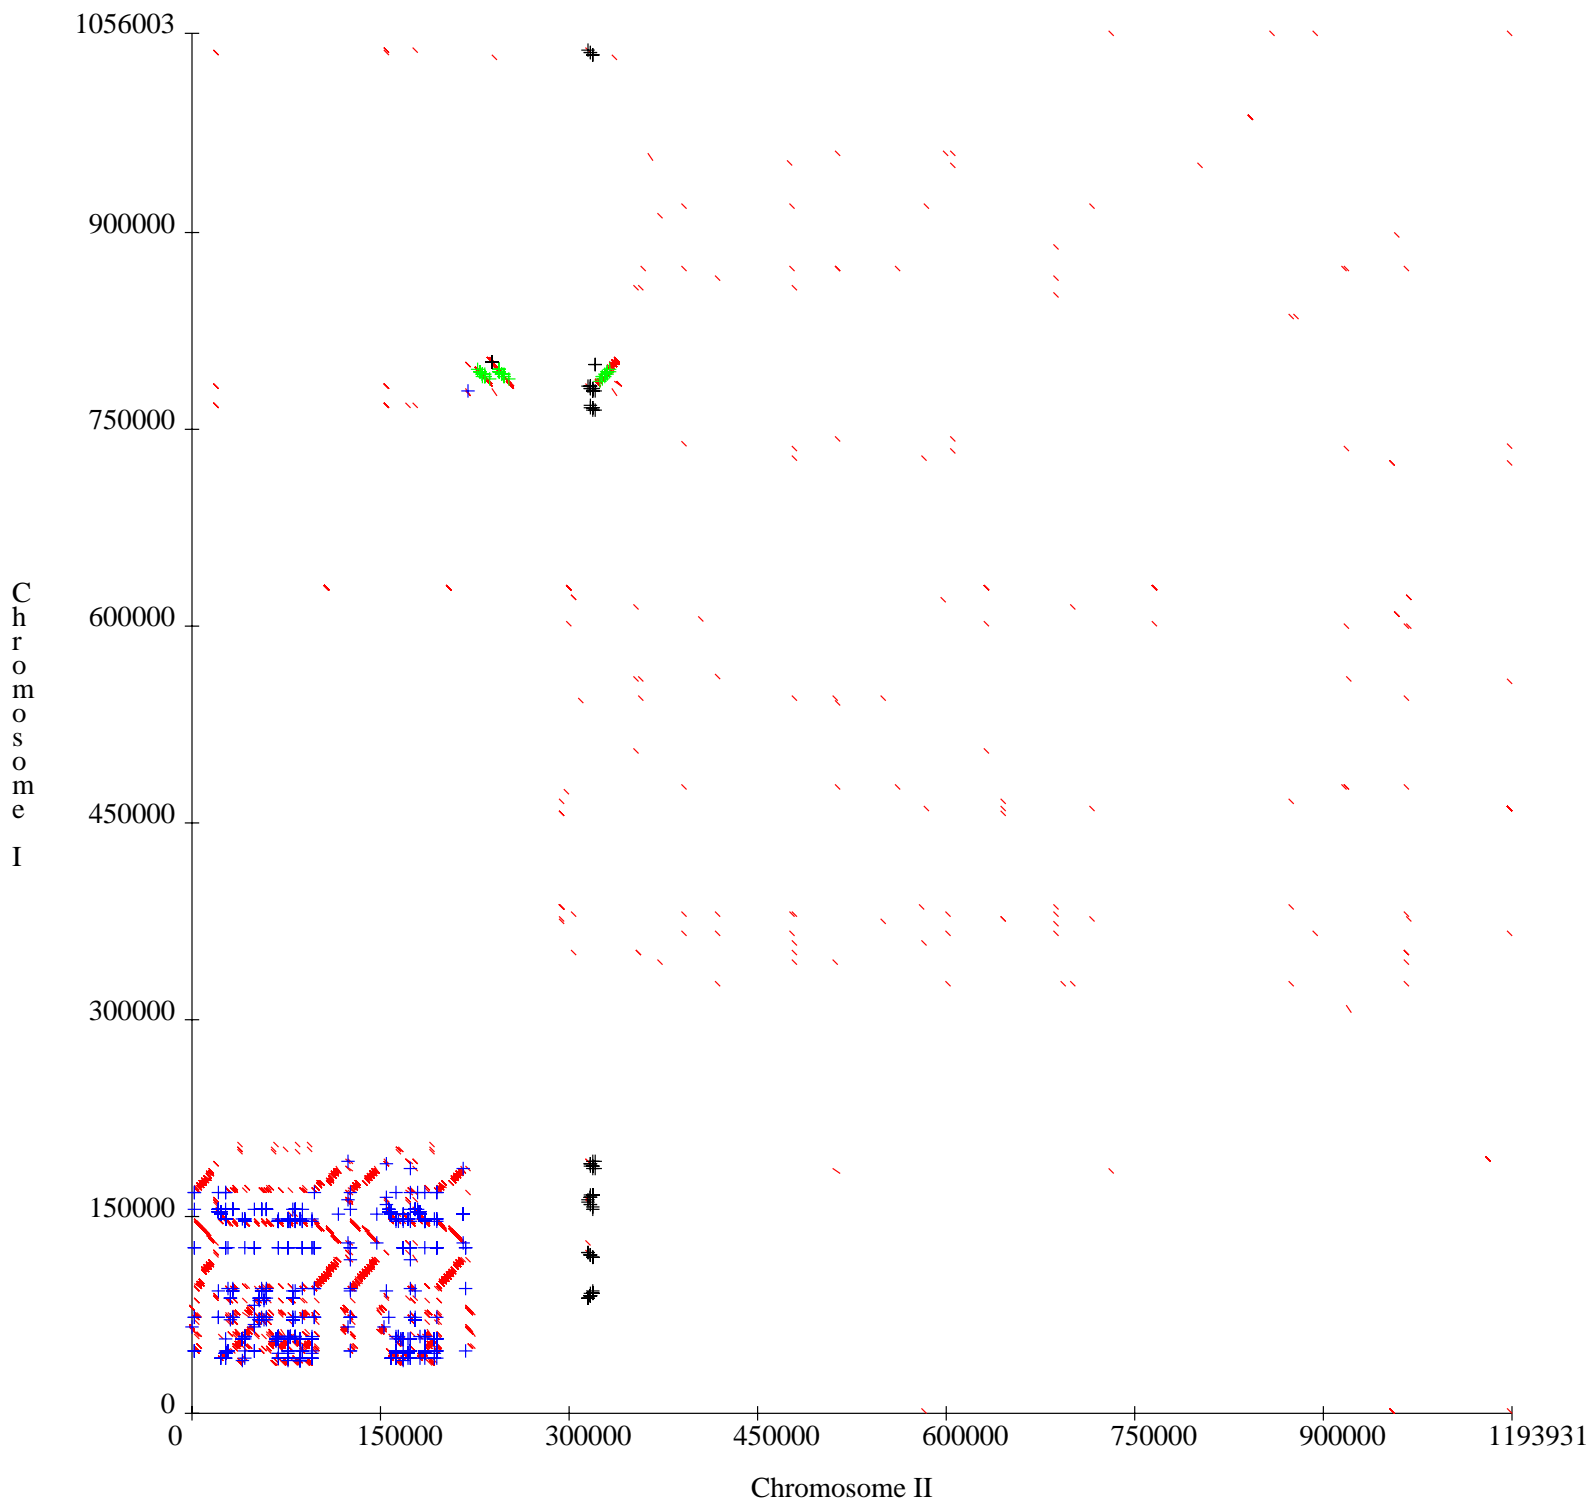

Supplement: nar_31_16_4856__3.pdf [file nar_31_16_4856__3.pdf]
